# Supplementary material for: Basicity of some P1phosphazenes in water and in aqueous surfactant solution
Source: Royal Society of Chemistry journal article supplement (doi:10.1039/b602797k), 2006-01-01
Supplement: b602797k.pdf [file b602797k.pdf]

**Figure 1. Interrelations Between Basicities of Bases Belonging to Different Families in Different Media.<sup>a</sup>**

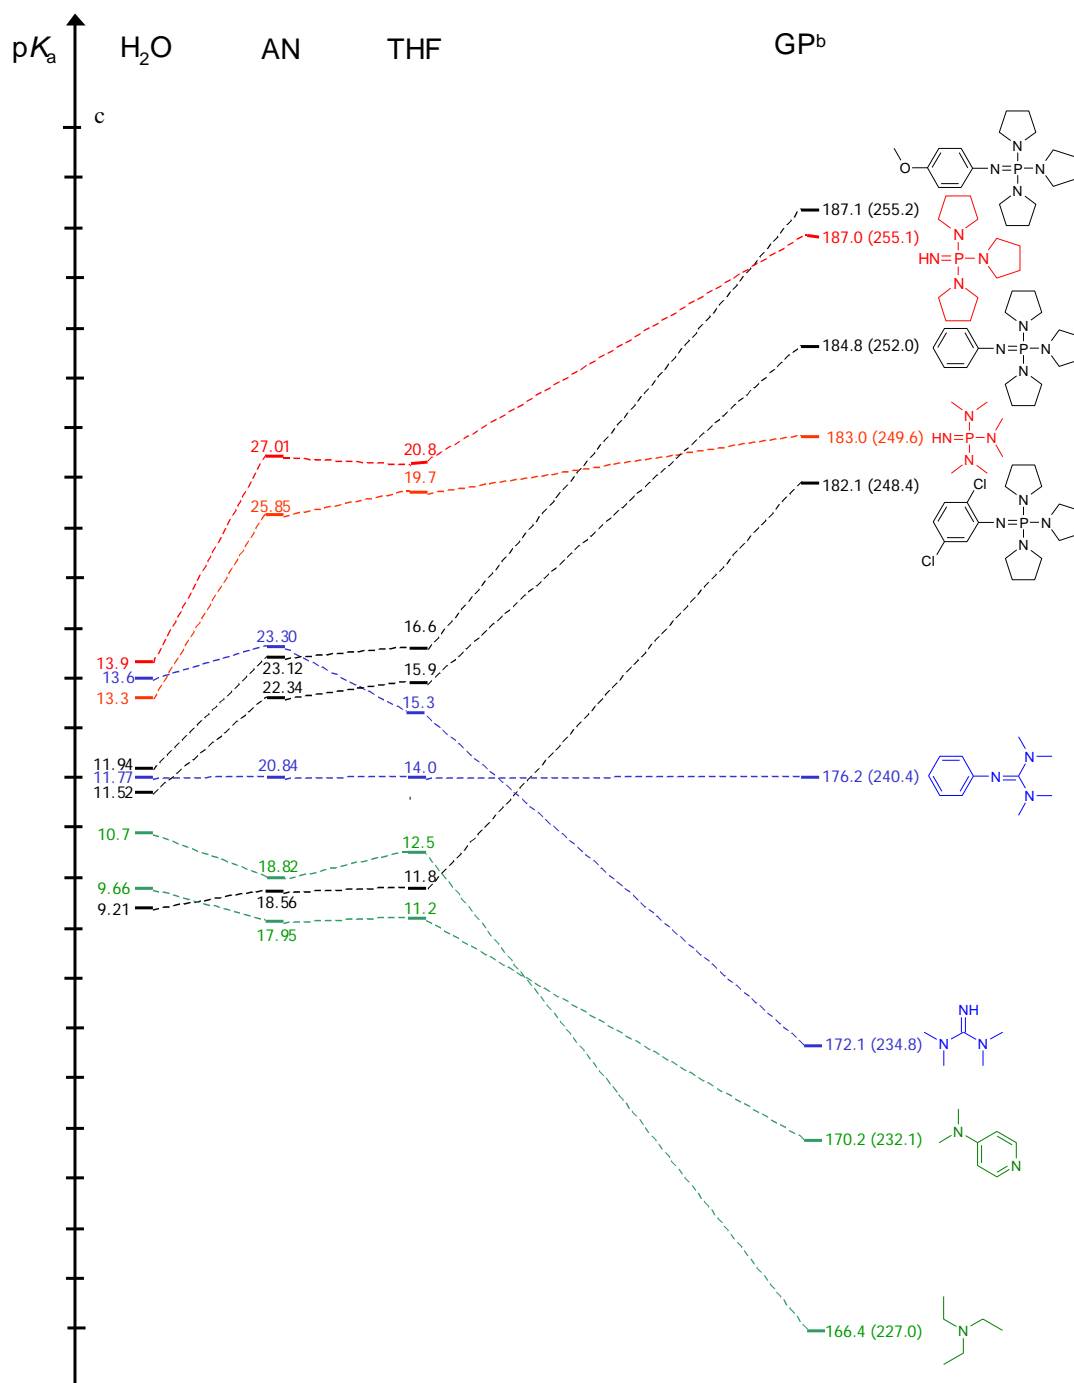

<sup>a</sup> The absolute  $pK_a$  values in different media are not directly comparable, so PhTMG has been used as an arbitrary reference compound for placement of the scales on the figure.

<sup>b</sup> The  $pK_a$  values for the gas phase (GP) are found according to the following equation  $pK_a(\text{GP}) = \text{GB} \cdot 2.30 / RT = \text{GB} / 1.364$ . The gas-phase basicities (in kcal/mol) are given in brackets.

<sup>c</sup> The  $pK_a$  arrow is divided into  $pK_a$  units but as the  $pK_a$  values in different media cannot be compared directly, the numbers were not added to the division markers.
